# Supplementary material
Source: publisher figshare collection journal article supplement (https://sage.figshare.com/ndownloader/files/15367643)
Supplement: Supplementary file 1 [file 15367643]

### Coded Empirical Studies - Supplemental Material for Learning in Action Sports: A Scoping Review.

Supplemental material, Coded Empirical Studies, for Learning in Action Sports: A Scoping Review by E. Ellmer, S. Rynne and E. Enright in European Physical Education Review.

| # | Authors/<br>Year                          | Aim                                                                                                                                                          | Sport/<br>Participants/<br>Skill level                             | Study Design/<br>Study Tools                                                                        | Analysis/<br>Theoretical,<br>Conceptual Frame | Main Findings                                                                                                                                                                             |
|---|-------------------------------------------|--------------------------------------------------------------------------------------------------------------------------------------------------------------|--------------------------------------------------------------------|-----------------------------------------------------------------------------------------------------|-----------------------------------------------|-------------------------------------------------------------------------------------------------------------------------------------------------------------------------------------------|
| 1 | Adi, Aditya,<br>& Citrawati<br>2010       | Use of 3D software to learn basic skateboard skills                                                                                                          | Skateboarding<br><br>30 males/females;<br>(15-25years);<br>various | <b>Mixed Method</b><br><br>Survey, interview,<br>User interface<br>(software)                       | Not specified                                 | The software provided a good alternative to learn basic skateboarding skills.                                                                                                             |
| 2 | Aggerholm &<br>Højbjerg<br>Larsen<br>2017 | To examine the bodily experience of parkour practitioners and analyse their process of practising and performing tricks as an acrobatic movement phenomenon. | Parkour<br><br>15 males;<br>(19-30years);<br>experienced           | <b>Qualitative</b><br><br><i>Ethnographic field study</i>                                           | Existential phenomenological analysis         | Acrobatics is an inherent and essential aspect of the self-organised practice of parkour allowing practitioners to carve out new possible movements for themselves and others.            |
| 3 | Bäckström<br>2014                         | To explore the kinaesthetic experience as bodily knowing emplaced in semi-formal teaching.                                                                   | Skateboarding<br><br>64 males/females;<br>(12-36years);<br>various | <b>Qualitative</b><br><br><i>Sensory<br/>Ethnography</i>                                            | Ongoing reflection;<br>Triangulation          | Emplaced in a sociocultural and spatio-temporal environment knowledge is formed along paths of movement.                                                                                  |
| 4 | Bicknell<br>2010                          | To examine the learning and skill development processes that can take place as an informed spectator watching a sporting event.                              | Mountain biking<br><br>1 female;<br>experienced                    | <b>Qualitative</b><br><br><i>Case study,<br/>Ethnographic,<br/>Phenomenological<br/>observation</i> | Descriptive analysis                          | Skill development is not always via (physical) practice, repetition, and attention to a complex set of rules, but can be developed through cognitive experiences also (i.e. observation). |

| # | Authors/<br>Year | Aim                                                                                                                             | Sport/<br>Participants/<br>Skill level                           | Study Design/<br>Study Tools                                                                        | Analysis/<br>Theoretical,<br>Conceptual Frame                                 | Main Findings                                                                                                                                                                                                                                                                                                                |
|---|------------------|---------------------------------------------------------------------------------------------------------------------------------|------------------------------------------------------------------|-----------------------------------------------------------------------------------------------------|-------------------------------------------------------------------------------|------------------------------------------------------------------------------------------------------------------------------------------------------------------------------------------------------------------------------------------------------------------------------------------------------------------------------|
| 5 | Bicknell<br>2016 | To examine the embodied experience through equipment and technology.                                                            | Mountain biking<br><br>1 female;<br>experienced                  | <b>Qualitative</b><br><br><i>Case study, Auto-ethnographic framework</i>                            | Phenomenology<br>Exploring ties between risk, place, equipment and perception | Human experiences are mediated by technology. Innovative designs can increase performance, participation rates, enjoyment and success.                                                                                                                                                                                       |
| 6 | Bignold<br>2013  | Impact of unicycling, a lifestyle sport, on young people's self-esteem, motivation, social skills, and other areas of learning. | Unicycling<br><br>148 males/females;<br>(11-19years);<br>various | <b>Mixed Method</b><br><br><i>Ethnographic methodology</i><br><br>Questionnaire, focus groups       | Not clear                                                                     | Challenge of learning new skills and developing further skills enables motivation, self-esteem, confidence and self-identity. It further helps to develop social skills.                                                                                                                                                     |
| 7 | Black<br>2005    | To investigate the experiences and subculture of skateboarders, exploring their perceptions of risk and injury in the sport.    | Skateboarding<br><br>15 males;<br>(14-18years);<br>various       | <b>Qualitative</b><br><br><i>Ethnographic fieldwork</i><br><br>Focus groups, interview, observation | Phenomenological analysis                                                     | Skateboarders do not appear to be reckless risk-takers; rather they demonstrate commitment and self-discipline, seeking physical and psychological self-mastery through careful calculation of ability and risk, employing strategies of injury prevention that include step-wise skill progression and knowing how to fall. |

| #  | Authors/<br>Year                | Aim                                                                                                                                                                                        | Sport/<br>Participants/<br>Skill level                                                     | Study Design/<br>Study Tools                                              | Analysis/<br>Theoretical,<br>Conceptual Frame       | Main Findings                                                                                                                                                                         |
|----|---------------------------------|--------------------------------------------------------------------------------------------------------------------------------------------------------------------------------------------|--------------------------------------------------------------------------------------------|---------------------------------------------------------------------------|-----------------------------------------------------|---------------------------------------------------------------------------------------------------------------------------------------------------------------------------------------|
| 8  | Boyce & Bischak 2010            | To distinguish between the effects of learning by doing and knowledge spill overs versus the effects of changes in technology or economic organisation on improved incidences upon ascent. | Mountaineering                                                                             | <b>Quantitative</b><br><br>Expedition reports, journals.                  | Data Analysis:<br>Probit model                      | Individual learning by doing and learning through knowledge spill overs contributed to an increase in ascent rates and the decrease in death, frostbite, and altitude sickness rates. |
| 9  | Clegg 2011                      | Dissertation<br>To explore the embodied experiences of practitioners of parkour and freerunning.                                                                                           | Parkour/<br>Freerunning<br><br>11 males/females;<br>(18-33years);<br>Intermediate-advanced | <b>Qualitative</b>                                                        | Edgework,<br>Phenomenology<br><br>Thematic analysis | The purpose in training is beyond playful, creative and social elements; Fundamentally safe activity; Takes place in an interactive community.                                        |
| 10 | Clegg & Butryn 2012             | Journal Article<br>As above                                                                                                                                                                | As above                                                                                   | As above                                                                  | As above                                            | As above                                                                                                                                                                              |
| 11 | Collins, Collins, & Grecic 2015 | Exploring the personal epistemology of adventure sports coaches, the existence of the epistemological chain and its impact on professional judgment and decision-making.                   | Various<br><br>7 males;<br>(M =50.3years);<br>experienced                                  | <b>Qualitative</b><br><br><i>Interpretative phenomenological approach</i> | Interpretative phenomenological analysis (IPA)      | Coaching and decision-making is impacted by personal, experiential learning, reflection, communities of practice, and continued professional development.                             |

| #  | Authors/<br>Year                            | Aim                                                                                                                                                                                                           | Sport/<br>Participants/<br>Skill level                              | Study Design/<br>Study Tools                               | Analysis/<br>Theoretical,<br>Conceptual Frame                               | Main Findings                                                                                                                                                                               |
|----|---------------------------------------------|---------------------------------------------------------------------------------------------------------------------------------------------------------------------------------------------------------------|---------------------------------------------------------------------|------------------------------------------------------------|-----------------------------------------------------------------------------|---------------------------------------------------------------------------------------------------------------------------------------------------------------------------------------------|
| 12 | Cordier,<br>Dietrich, &<br>Pailhous<br>1996 | To introduce a new technique for analysing the dynamics of motor learning in the context of a rock climbing task.                                                                                             | Rock climbing<br><br>5 experts, 5 non-experts                       | <b>Quantitative</b><br><br>Video,<br>spatial trajectories  | Harmonic (Fourier) analysis                                                 | Motor performance (learning) and expertise are dynamic processes and cooperative processes (sensorimotor coupling);<br>The natural environment constrains subject motricity.                |
| 13 | Correia &<br>Bertram<br>2018                | To investigate the specific sources of knowledge acquisition of surfing coaches.                                                                                                                              | Surfing<br><br>11 males;<br>experienced                             | <b>Qualitative</b><br><br>Interview                        | Learning situations (Nelson)<br><br>Basic unit analysis                     | Formal education: higher education;<br>non-formal: coaching courses;<br>informal: previous sporting experiences, books, internet.                                                           |
| 14 | De Ghetaldi<br>1998                         | To determine the effects of self-modelling on rock climbing self-efficacy, motivation to learn rock climbing skills, rock climbing skill performance, and rock climbing knowledge in beginning rock climbers. | Rock Climbing<br><br>40 males/females;<br>(18-38years);<br>beginner | <b>Mixed Method</b><br><br>Video,<br>questionnaire, scale  | Statistical analysis, ANOVA                                                 | Self-modelling effective in improving intrinsic motivation in beginners;<br>Rock climbing classes are effective in rock climbing self-efficacy, motivation, skill and knowledge.            |
| 15 | Ellmer &<br>Rynne<br>2016                   | To explore the learning trajectory of an elite Trials bike rider.                                                                                                                                             | BMX Trials Bike Riding<br><br>1 female<br>(25years);<br>elite       | <b>Qualitative</b><br><br><i>Case study,</i><br><i>IPA</i> | Workplace learning theory (relational interdependence, Billett);<br><br>IPA | Learning skills autonomously (learning by doing);<br>Feedback from peers and 'coach';<br>Learning through videos and the internet, however, feedback through online videos not as valuable. |

| #  | Authors/<br>Year                   | Aim                                                                                           | Sport/<br>Participants/<br>Skill level                          | Study Design/<br>Study Tools                                                         | Analysis/<br>Theoretical,<br>Conceptual Frame                                    | Main Findings                                                                                                                                                                                            |
|----|------------------------------------|-----------------------------------------------------------------------------------------------|-----------------------------------------------------------------|--------------------------------------------------------------------------------------|----------------------------------------------------------------------------------|----------------------------------------------------------------------------------------------------------------------------------------------------------------------------------------------------------|
| 16 | Enright &<br>Gard<br>2016          | To examine the role of digital media on sport.                                                | Longboard (skateboarding)<br><br>(12-25years)                   | <b>Qualitative</b><br><br><i>Ethnographic and participatory approaches</i>           | Connectivism/<br>Network metaphor<br>Difficult to ascertain                      | New media technologies play a role in learning:<br>Longboarders are both learners and teachers; They enter, construct, exit own lines of flight according to learning styles, skill levels and ambition. |
| 17 | Evers<br><br>2004                  | To understand the lived experience as a male surfer.                                          | Surfing<br><br>Male;<br>experienced                             | <b>Qualitative</b><br><br><i>Auto-Ethnography</i>                                    | Not specified                                                                    | ‘Becoming’ a (male) surfer is a complex lived experience of surging relations; The body is always in various forms of locomotion, engaged with other bodies, and one that feels.                         |
| 18 | Evers<br><br>2006                  | To explore the sensual world of men who surf.                                                 | Surfing<br><br>Male;<br>experienced                             | <b>Qualitative</b><br><br><i>Auto-Ethnography</i>                                    | Self-Reflection<br>Affect Theory<br>Grounded Analysis                            | The social–biological–psychological have a dynamic relationship.                                                                                                                                         |
| 19 | Evin, Sève,<br>& Saury<br>2014     | To examine constructing trust judgements in cooperative interactions during climbing lessons. | Rock Climbing<br><br>2 (grade 10);<br>previous<br>experience    | <b>Qualitative</b><br><br>Audio and video recording,<br>Self-confrontation interview | Audio and video analysis                                                         | The construction of mutual trust increased cooperation and can therefore positively affect the effective learning of collective tasks.                                                                   |
| 20 | Fernandez-<br>Rio & Suarez<br>2014 | To assess students' ideas, views and feelings after experiencing a parkour learning unit.     | Parkour<br><br>26 males/females;<br>(11-12 years);<br>beginners | <b>Qualitative</b><br><br><i>Intervention study</i><br><br>Interview                 | MAXQDA 11 for data management;<br>Thematic content analysis, constant comparison | Parkour has an educational content due to different positive outcomes; Promotion of development of social and problem-solving skills and has the ability to help students cope with fear.                |

| #  | Authors/<br>Year                           | Aim                                                                                                                                          | Sport/<br>Participants/<br>Skill level                 | Study Design/<br>Study Tools                                                  | Analysis/<br>Theoretical,<br>Conceptual Frame                          | Main Findings                                                                                                                                                                                                                                                                                           |
|----|--------------------------------------------|----------------------------------------------------------------------------------------------------------------------------------------------|--------------------------------------------------------|-------------------------------------------------------------------------------|------------------------------------------------------------------------|---------------------------------------------------------------------------------------------------------------------------------------------------------------------------------------------------------------------------------------------------------------------------------------------------------|
| 21 | Ghosh, Shah,<br>Navarro, &<br>Chen<br>2015 | To investigate the potential of using musical feedback to enhance the skateboarding experience and to encourage skaters to gain more skills. | Skateboarding<br><br>11<br>beginner-expert             | <b>Qualitative</b><br><br>Field observation,<br>semi-structured<br>interviews | Coding; Affinity map                                                   | Audio-feedback increases satisfaction of skating and has potential use in supporting and rewarding users for performing tricks.                                                                                                                                                                         |
| 22 | Golding<br>2011                            | To examine the learning experienced through participation by men in two different motor sport organisations.                                 | Motor Sports<br><br>219 Male (adult);<br>Not specified | <b>Qualitative</b><br><br>Focus groups,<br>survey                             | Australian Core Skills Framework;<br><br>Narrative analysis            | Learning opportunities are presented through the organisation; Community of practice is an alternate form to 'formal' tertiary education; Learning is co-constructed with other members and results in identity formation.                                                                              |
| 23 | Gravestock<br>2016                         | To investigate the training practices used by the traceur.                                                                                   | Parkour<br><br>Not specified                           | <b>Qualitative</b><br><br><i>Scenography</i><br><br>Drawings                  | Pas de Deux as investigative framework;<br><br>Analysis not specified. | Parkour and pas de deux are two distinct and different art forms; Parkour has a partnership with space/environment (similar to ballet and partner-dance); Moments of instability and failure exist, and create options for re-establishing balance, creating a 'dialogue' with the partner/environment. |

| #  | Authors/<br>Year                      | Aim                                                                                                                                                                                                     | Sport/<br>Participants/<br>Skill level                                 | Study Design/<br>Study Tools                                                                                           | Analysis/<br>Theoretical,<br>Conceptual Frame | Main Findings                                                                                                                                                                                                                                                 |
|----|---------------------------------------|---------------------------------------------------------------------------------------------------------------------------------------------------------------------------------------------------------|------------------------------------------------------------------------|------------------------------------------------------------------------------------------------------------------------|-----------------------------------------------|---------------------------------------------------------------------------------------------------------------------------------------------------------------------------------------------------------------------------------------------------------------|
| 24 | Gray &<br>Collins<br>2016             | What interpersonal strategies are employed by adventure sports coaches to influence participants' action and behaviour?                                                                                 | Paddle sports, various<br><br>4 males;<br>(39-45years);<br>experienced | <b>Qualitative</b><br><br><i>IPA</i>                                                                                   | IPA, inductive analysis                       | Coaches have well-established intuitive social engagement skills, however, they are not consciously or declaratively employed in coaching sessions or used at strategic levels to enhance participant development.                                            |
| 25 | Greenberg<br><br>2017                 | How Parkour Coaches learn their craft and their perceptions of current parkour coach education programs.                                                                                                | Parkour<br><br>19 males/females;<br>(M=25.8 years);<br>various         | <b>Qualitative</b><br><br><i>Basic Interpretive<br/>Qualitative<br/>Methodology</i><br><br>Questionnaire,<br>Interview | Thematic Analysis                             | Due to mainly unorganised nature of the sport, many coaches are responsible for their own learning and development. Main sources of knowledge are from previous experience, other coaches, reflection, coach education programs, and the internet.            |
| 26 | Haines,<br>Smith, &<br>Baxter<br>2016 | To describe the values, behaviours, and beliefs of skateboarders in order to understand the meaning and identity derived from the occupation as well as cultural influences on attitudes toward injury. | Skateboarding<br><br>7 males;<br>(18-35 years);<br>various             | <b>Qualitative</b><br><br>Semi-structured interviews                                                                   | Coding                                        | Learning is a core part skateboarding and tends to occur in social environments. They constantly perform risk analysis and are motivated by the challenge required to perfect a trick. Core values and freedom of the subculture outweigh the risk of injury. |

| #  | Authors/<br>Year                                   | Aim                                                                                                                                                                           | Sport/<br>Participants/<br>Skill level                                          | Study Design/<br>Study Tools                                            | Analysis/<br>Theoretical,<br>Conceptual Frame             | Main Findings                                                                                                                                                                                                                              |
|----|----------------------------------------------------|-------------------------------------------------------------------------------------------------------------------------------------------------------------------------------|---------------------------------------------------------------------------------|-------------------------------------------------------------------------|-----------------------------------------------------------|--------------------------------------------------------------------------------------------------------------------------------------------------------------------------------------------------------------------------------------------|
| 27 | Hennings, Wallhead, & Byra 2010                    | To use a didactic methodology to examine the content taught and learned by two pairs of undergraduate students participating in reciprocal style episodes of indoor climbing. | Rock climbing<br><br>6 males/females; beginner                                  | <b>Qualitative</b><br><br><i>Didactic, quasi-ethnographic framework</i> | Interpretivist paradigm;<br><br>Didactic content analysis | Methodology ineffective in developing content knowledge and an increase in performance of higher complexity tasks. However, learning is situated (i.e. Co-construction of knowledge through dialogue, peer-observers for error detection). |
| 28 | Hoffmannová, Šebek, Allison, Maina, & Toogood 2017 | To examine the interrelations of past events, present experience, and anticipated future actions during the careers of the studied lifestyle sports athletes.                 | Snowboarding<br>Freeskiing<br><br>19 males/females; (m=23.5 years); experienced | <b>Qualitative</b><br><br>Focus groups, Interviews, Observation         | Lifeline Method<br><br>Grounded Theory                    | Careers in lifestyle sports are increasingly non-linear; inseparability of the sporting activity and “who the athletes are”; cultural and social contexts play a role in the individuals’ careers.                                         |
| 29 | Højbjerg Larsen 2016                               | What can we learn from analysing the bodily practice of learning new movement at a high level of skill in parkour?                                                            | Parkour<br><br>1 male; experienced                                              | <b>Qualitative</b><br><br><i>Ethnographic field study</i>               | Theoretical perspective of craftsmanship (Sennett)        | Creation of dialogue between practitioner (thinking), concrete and material practices. Provides insight into ontology of play and plays an important role in skills development.                                                           |
| 30 | Hollett 2017                                       | Examining the symbiotic relationship between a teen skateboarder and videographer.                                                                                            | Skateboarding<br><br>2 males; (16-17years); experienced                         | <b>Qualitative</b><br><br>Video, observations, interview                | Interaction analysis                                      | Symbiotic learning partnerships are about the development of specific skills (through nurturing cycles) but also the relationship between the two.                                                                                         |

| #  | Authors/<br>Year                                          | Aim                                                                                                                                             | Sport/<br>Participants/<br>Skill level                                 | Study Design/<br>Study Tools                                                               | Analysis/<br>Theoretical,<br>Conceptual Frame                                                | Main Findings                                                                                                                                                                                 |
|----|-----------------------------------------------------------|-------------------------------------------------------------------------------------------------------------------------------------------------|------------------------------------------------------------------------|--------------------------------------------------------------------------------------------|----------------------------------------------------------------------------------------------|-----------------------------------------------------------------------------------------------------------------------------------------------------------------------------------------------|
| 31 | Jones<br>2011                                             | The role of digital media and creativity in the processes of learning, both mastery of technique and integration into the culture of the sport. | Skateboarding,<br><br>60 males;<br>(14-28years);<br>various            | <b>Qualitative</b><br><br><i>Ethnographic study</i>                                        | Constant comparative approach,<br>theoretical model of mediated discourse analysis, atlas.ti | Skateboarders use video (in a number of ways) to facilitate their learning and integration into their communities (i.e. analysing tricks, documenting learning and socialising trajectories). |
| 32 | Kaplan-Reimer,<br>Sidener,<br>Reeve, &<br>Sidener<br>2011 | To evaluate the use of an intervention package for teaching indoor rock climbing to children with autism.                                       | Rock climbing,<br><br>2 females;<br>(6-11 years);<br>beginner          | <b>Mixed Method</b><br><br><i>Intervention study</i><br><br>Interview, Stimulus assessment | Statistical analysis                                                                         | The use of conditional discrimination techniques effective in individuals with autism;<br>Early error correction (verbal) may have helped increase skill acquisition.                         |
| 33 | Kerr &<br>Mackenzie<br>2014                               | To examine the experience of mastery and the motivational processes involved in taking on new challenges in skydiving.                          | Skydiving<br><br>1 male;<br>(37years);<br>experienced                  | <b>Qualitative</b><br><br>Interview                                                        | Reversal theory-based<br>Meta-motivational<br>State Coding Schedule                          | Accepting renewed challenges and learning new skills is important in maintaining motivation.                                                                                                  |
| 34 | Kidder<br>2012                                            | To investigate how the virtual worlds of on-screen life are emplaced in the real world (through parkour practices).                             | Parkour<br><br>22 males/females;<br>(late teens-early 20s);<br>various | <b>Qualitative</b><br><br><i>Ethnographic, Extended case method</i>                        | Grounded theory                                                                              | On-screen Pedagogy: internet crucial for transmission of parkour knowledge (e.g. YouTube tutorials) and virtual interactions to learn skills but also to overcome obstacles.                  |

| #  | Authors/<br>Year        | Aim                                                                                                                                  | Sport/<br>Participants/<br>Skill level                                                 | Study Design/<br>Study Tools                                                                   | Analysis/<br>Theoretical,<br>Conceptual Frame                     | Main Findings                                                                                                        |
|----|-------------------------|--------------------------------------------------------------------------------------------------------------------------------------|----------------------------------------------------------------------------------------|------------------------------------------------------------------------------------------------|-------------------------------------------------------------------|----------------------------------------------------------------------------------------------------------------------|
| 35 | Kidder<br>2013          | Exploring risks and rituals taken by freerunners in training sessions.                                                               | Parkour/<br>Freerunning<br><br>22 males/females;<br>(late teens-early 20s);<br>various | <b>Qualitative</b><br><br>Participant observation,<br>interviews                               | Not specified                                                     | Rituals of symbolic safety: Progression, conditioning and stretching exercises help in mediating risk.               |
| 36 | Künzell & Lukas<br>2011 | Students receiving prescriptive skateboard training will demonstrate better performance in an upcoming snowboard course for novices. | Skateboarding,<br>Snowboarding<br><br>18 males/females;<br>(14-18years);<br>beginners  | <b>Quantitative</b><br><br><i>Experimental design</i><br><br>Video tape,<br>Performance rating | Statistical analysis                                              | Skateboarding lessons have facilitative effect on learning how to snowboard successfully.                            |
| 37 | Kulcycki<br>2014        | What can we learn from outdoor climbing sites?                                                                                       | Rock climbing<br><br>21 males/females;<br>(18-36years);<br>various                     | <b>Qualitative</b><br><br>Interview                                                            | Inductive analysis,<br>coding                                     | Climbing places are physical places associated with the act of climbing, exploring the site and social interactions. |
| 38 | Lagache<br>1995         | To examine SCUBA diving classes as communities of practice.                                                                          | SCUBA Diving<br><br>Not specified                                                      | <b>Qualitative</b><br><br><i>Ethnographic design</i>                                           | Situated learning theory;<br><br>Existential analysis (Heidegger) | SCUBA diving classes are communities of practice that indeed fosters social interactions that enhance learning.      |

| #  | Authors/<br>Year     | Aim                                                                                                                                                         | Sport/<br>Participants/<br>Skill level                 | Study Design/<br>Study Tools                                               | Analysis/<br>Theoretical,<br>Conceptual Frame                                                             | Main Findings                                                                                                                                                                                                            |
|----|----------------------|-------------------------------------------------------------------------------------------------------------------------------------------------------------|--------------------------------------------------------|----------------------------------------------------------------------------|-----------------------------------------------------------------------------------------------------------|--------------------------------------------------------------------------------------------------------------------------------------------------------------------------------------------------------------------------|
| 39 | Lamb<br>2011         | This study explores the production of urban architectural space and investigates how the art of parkour attempts to (re)appropriate the spaces of the city. | Parkour<br><br>15 males/females (9-30years); various   | <b>Qualitative</b><br><br>Interview, participant observation, focus groups | Parkour as both method and analysis;<br><br>Interpretative analysis                                       | Chapter 5:<br>Relationship between architecture and the body exists. Pedagogy of space (i.e. obstacles allow for creativity).                                                                                            |
| 40 | Langseth<br>2012     | To examine the identity construction on an individual and group level among Norwegian surfers.                                                              | Surfing<br><br>22 males/females; experienced           | <b>Qualitative</b><br><br><i>Ethnography</i>                               | Identity construction (Donnelly and Young) and symbolic capital (Bordieu);<br><br>Analysis not specified. | Rules and subcultural values determine inclusion/ exclusion of communities and how identities are constructed.                                                                                                           |
| 41 | Light<br>2006        | Examining learning and identity formation for young Australians in a surf club.                                                                             | Surfing<br><br>4 males/females; (14years); Experienced | <b>Qualitative</b><br><br>Interview, observation                           | Situated learning, Communities of Practice (CoP) to guide analysis.                                       | Learning is complex, multi-dimensional and socially situated. Each learner has their own learning trajectory as they develop skills, knowledge and cultural understanding (both through physical and social engagement). |
| 42 | Light & Nash<br>2006 | surf clubs as learning sites compared to schools and other sporting clubs                                                                                   | Surfing<br><br>4 males/females; (14years); Experienced | <b>Qualitative</b><br><br>Interview, field notes, observation              | Situated learning, CoP and LPP;<br><br>Grounded theory                                                    | Learning is a complex process located in particular in social, cultural and institutional contexts; Learning is ongoing, not restricted to formal schooling.                                                             |

| #  | Authors/<br>Year                           | Aim                                                                                                                                          | Sport/<br>Participants/<br>Skill level                            | Study Design/<br>Study Tools                                 | Analysis/<br>Theoretical,<br>Conceptual Frame                                                                   | Main Findings                                                                                                                                                                                                                                       |
|----|--------------------------------------------|----------------------------------------------------------------------------------------------------------------------------------------------|-------------------------------------------------------------------|--------------------------------------------------------------|-----------------------------------------------------------------------------------------------------------------|-----------------------------------------------------------------------------------------------------------------------------------------------------------------------------------------------------------------------------------------------------|
| 43 | Lorimer &<br>Holland-<br>Smith<br><br>2012 | To examine the influences that led an individual to becoming and remaining an outdoor adventure sport coach                                  | Climbing/<br>Kayaking<br><br>Male;<br>expert                      | <b>Qualitative</b><br><br><i>Case study</i><br><br>Interview | Biographical Research<br>Thematic Analysis                                                                      | Socialisation processes (influences from family members and school teachers); Early participation in sports; Mastering complex physical and psychological skills increased motivation to partake in sporting activities.                            |
| 44 | Ma & Munter<br>2014                        | To examine the dialectic relationship between activity and space/setting and how learning occurs.                                            | Skateboarding<br><br>Males/females;<br>(10-24years);<br>various   | <b>Qualitative</b><br><br><i>Ethnographic</i>                | Coding, ongoing<br>analysis, dialectical<br>approach                                                            | Dialectical relationship between setting and activity is socially produced;<br>Space continually 'edited' by skaters, creating new learning opportunities.                                                                                          |
| 45 | MacNeill<br>2007                           | To explore the processes that contribute to optimal preparation and optimal performance of an athlete competing at the Winter Olympic Games. | Various,<br>Snowboarding<br><br>1 female;<br>(28years);<br>expert | <b>Qualitative</b><br><br>Interview                          | Performance<br>psychology as<br>conceptual frame;<br><br>Content-narrative<br>analysis                          | Optimal preparation and optimal performance is a fluid process; they have courage to test the system and create environment that will allow them to succeed; preparation a major aspect of; reflection on training and ability to adapt to context. |
| 46 | Magnussen<br>2010                          | To examine imitation as a learning strategy in kayaking communities.                                                                         | Sea Kayak<br><br>23 males/females;<br>expert                      | <b>Qualitative</b><br><br><i>Ethnographic<br/>fieldwork</i>  | Situated learning;<br><br>Naturalistic-inquiry<br>approach (Patton);<br><br>Analysis difficult to<br>ascertain. | Imitation is an inferior learning strategy, particularly for participants with greater competence.                                                                                                                                                  |

| #  | Authors/<br>Year                                          | Aim                                                                                                                                                                      | Sport/<br>Participants/<br>Skill level                                                                                       | Study Design/<br>Study Tools                         | Analysis/<br>Theoretical,<br>Conceptual Frame                                            | Main Findings                                                                                                                                                                                                                                                                                                                                                                                    |
|----|-----------------------------------------------------------|--------------------------------------------------------------------------------------------------------------------------------------------------------------------------|------------------------------------------------------------------------------------------------------------------------------|------------------------------------------------------|------------------------------------------------------------------------------------------|--------------------------------------------------------------------------------------------------------------------------------------------------------------------------------------------------------------------------------------------------------------------------------------------------------------------------------------------------------------------------------------------------|
| 47 | McCormack<br>2017                                         | To understand how participants create a unique identity and remain open to outsiders. And how long-time participants manage this expanding and less exclusive community. | Mountain biking<br><br>60 males/females;<br>(M=43 years);<br>various                                                         | <b>Qualitative</b><br><br>Interviews                 | Theoretical Memoing                                                                      | Bikers do not establish their identity in opposition to peripheral or nonparticipants. Rather, they welcome new riders in and solidify their identity through the encouragement, training, and development of new riders.                                                                                                                                                                        |
| 48 | McNamee &<br>Steffen<br>2007                              | To examine the effects of performance cues on beginning indoor rock climbers.                                                                                            | Rock Climbing<br><br>42 males/females;<br>(18-27years);<br>beginners                                                         | <b>Quantitative</b><br><br><i>Intervention study</i> | Content analysis<br>(performance cues);<br>Standard descriptive<br>techniques;<br>ANOVAs | Improvement in performance following performance cues.                                                                                                                                                                                                                                                                                                                                           |
| 49 | Mencarini,<br>Leonardi,<br>Angeli, &<br>Zancanaro<br>2016 | Whether and how wearable devices can support the learning of climbing, a sport that entails a great physical and emotional involvement.                                  | Sport Climbing<br><br>11 males/females;<br>(M=24 years);<br>beginner<br><br>5 males/females;<br>(M=37 years);<br>experienced | <b>Qualitative</b><br><br>Observation,<br>Interviews | Contextual Inquiry<br>Grounded Theory                                                    | Climbing has a strong emotional impact on beginners; therefore, learning to climb requires mastering new motor patterns as well as negative emotions, such as stress and fear. The feeling of danger that climbers often experience can be mitigated by trust in the climbing partner. Finally, communication difficulty between the climbing partners and between climber and instructor exist. |

| #  | Authors/<br>Year                       | Aim                                                                                                                                                                         | Sport/<br>Participants/<br>Skill level                                                                   | Study Design/<br>Study Tools                                                 | Analysis/<br>Theoretical,<br>Conceptual Frame          | Main Findings                                                                                                                                                  |
|----|----------------------------------------|-----------------------------------------------------------------------------------------------------------------------------------------------------------------------------|----------------------------------------------------------------------------------------------------------|------------------------------------------------------------------------------|--------------------------------------------------------|----------------------------------------------------------------------------------------------------------------------------------------------------------------|
| 50 | Mohamed, Favrod, Philippe, & Hauw 2015 | How can risks associated with skydiving be managed within acceptable limits?                                                                                                | Skydiving<br><br>4 males;<br>(M=30.25years);<br>expert                                                   | <b>Qualitative</b><br><br>Video, self-confrontation interview                | Course of action theory (Theureau),<br><br>Coding      | The notion of embedded practical knowledge about the risky sport can be used to improve education programs for skydiving performance.                          |
| 51 | Moreira & Peixoto 2014                 | Can a sporting discipline be characterised through context and individuals' behaviours?                                                                                     | Surfing<br><br>5 surfers;<br>(AV=23years);<br>expert                                                     | <b>Qualitative</b><br><br><i>Interpretative case study, MAST</i>             | Matrix of Analysis for Sports Tasks (MAST)             | MAST is a beneficial tool to help increase developmental strategies that benefit teaching and performance interventions and aids long-term surfer development. |
| 52 | Nelson 2005                            | To determine whether an external focus of attention was also advantageous for the performance and learning of a more complex open motor skill performed in a field setting. | Mountain bike<br><br>24 males/females;<br>(18-30 years);<br>No formal coaching or competition experience | <b>Quantitative</b><br><br><i>Intervention study</i>                         | Statistical analysis;<br>ANOVAs                        | All groups showed improvements in performance and learning.                                                                                                    |
| 53 | O'Grady 2012                           | How parkour training is constructed and transmitted amongst localised peer groups.                                                                                          | Parkour<br><br>Male<br>(16-32years);<br>various                                                          | <b>Qualitative</b><br><br>Interview;<br>Online forums,<br>internet resources | Social learning theory;<br><br>Analysis not specified. | Learning is embodied in the social and physical environment.                                                                                                   |

| #  | Authors/<br>Year                | Aim                                                                                                              | Sport/<br>Participants/<br>Skill level    | Study Design/<br>Study Tools                                | Analysis/<br>Theoretical,<br>Conceptual Frame                    | Main Findings                                                                                                                                                                                                                                                                                                                                                                                                                                                                                                  |
|----|---------------------------------|------------------------------------------------------------------------------------------------------------------|-------------------------------------------|-------------------------------------------------------------|------------------------------------------------------------------|----------------------------------------------------------------------------------------------------------------------------------------------------------------------------------------------------------------------------------------------------------------------------------------------------------------------------------------------------------------------------------------------------------------------------------------------------------------------------------------------------------------|
| 54 | Ojala & Thorpe<br>2015          | Considering the role of the coach in Finnish elite snowboarders using the problem-based learning (PBL) approach. | Snowboarding<br><br>Males/females; expert | <b>Qualitative</b><br><br>Conversations                     | Problem-based learning;<br><br>Analysis not specified.           | PBL approach is a useful tool. Coaches to avoid top-down approach and embrace a respectful, non-hierarchical relationship. The relationship is to be built on the needs and motives significant to the athlete (taking into account the unique value system of action sports culture).                                                                                                                                                                                                                         |
| 55 | Olive<br>2016                   | To understand the (female) surf culture in Byron Bay.                                                            | Surfing<br><br>Females; recreational      | <b>Qualitative</b><br><br><i>Ethnographic</i>               | Feminist cultural interpretation;<br><br>Analysis not specified. | Knowledge and behaviours are learned through social, cultural and subjective relationships; Ethical negotiations of cultural power relations are considered.                                                                                                                                                                                                                                                                                                                                                   |
| 56 | Orth, Davids, & Seifert<br>2016 | To provide an overview of constraints on skilled coordination in climbing.                                       | Rock climbing<br><br>Various              | <b>Qualitative</b><br><br><i>Systemic literature review</i> | Qualitative synthesis of 42 studies                              | Perceptual and motor adaptations that improve skilled coordination are highly significant for improving the climbing ability level. Elite climbers exhibit advantages in detection and use of climbing opportunities when visually inspecting a route from the ground and when physically moving through a route. However, the need to provide clear guidelines on how to improve climbing skill arises from uncertainties regarding the impacts of different practice interventions on learning and transfer. |

| #  | Authors/<br>Year                                                                        | Aim                                                                                                                                                                                      | Sport/<br>Participants/<br>Skill level                                                                                       | Study Design/<br>Study Tools                                                        | Analysis/<br>Theoretical,<br>Conceptual Frame                                                                  | Main Findings                                                                                                                                                                                                                                                                                                                                                 |
|----|-----------------------------------------------------------------------------------------|------------------------------------------------------------------------------------------------------------------------------------------------------------------------------------------|------------------------------------------------------------------------------------------------------------------------------|-------------------------------------------------------------------------------------|----------------------------------------------------------------------------------------------------------------|---------------------------------------------------------------------------------------------------------------------------------------------------------------------------------------------------------------------------------------------------------------------------------------------------------------------------------------------------------------|
| 57 | Orth, Davids,<br>& Seifert<br>2018a                                                     | To determine if through practice, individuals would acquire a new, more advanced pattern of coordination.                                                                                | Climbing<br><br>8 participants;<br>Beginner                                                                                  | <b>Quantitative</b><br><br>Pre/Post Test                                            | Ecological Dynamics Approach;<br><br>Statistical Analysis;<br>ANOVA                                            | The nature of each individual's learning is not dependent on whether he/she can be classified prior to practice as a beginner. Rather, the nature of learning dynamics was likely dependent on each individual's behavioural repertoire prior to practice.                                                                                                    |
| 58 | Orth, Davids,<br>Chow,<br>Brymer, &<br>Seifert<br>2018b                                 | To consider potential interactions between prior experience and environmental properties on behavioural certainty during learning and transfer, when performing an indoor climbing task. | Climbing<br><br>7 participants;<br>(M=20.9 years);<br>less skilled<br><br>7 participants;<br>(M=24.9 years);<br>more skilled | <b>Quantitative</b>                                                                 | Ecological Dynamics Approach;<br><br>Mixed Method;<br>ANOVA;                                                   | 1. Learning can be induced using meta-stable design principles regardless of the initial skill level of the participants;<br>2. existing experience level of the participants interacted with specific route design properties;<br>3. Skill transfer was seen in both groups; however, the nature of skill transfer was dependent on the initial skill level. |
| 59 | Perez-Turpin,<br>Cortell-Tormo,<br>Suárez<br>Llorca, Mira,<br>José, &<br>Andreu<br>2009 | To identify the influence of situated learning in kitesurfing classes.                                                                                                                   | Kitesurfing<br><br>4 males/females;<br>(22years);<br>beginners                                                               | <b>Mixed Method</b><br><br><i>Quasi-experimental design</i><br><br>Interview, video | Situated learning theory<br><br>Quantitative analysis: Sportstec software,<br>Qualitative analysis: AQUAD five | All participants increased their control of sport specific motor skills; Learning involves a process of enculturation regarding language (vocabulary), customs (values) and belief and leads to the development of a new identity. However, this is not always positive (i.e. lack of respect, use of drugs, alcohol, delinquency).                           |

| #  | Authors/<br>Year                                                   | Aim                                                                                                                                         | Sport/<br>Participants/<br>Skill level                     | Study Design/<br>Study Tools                  | Analysis/<br>Theoretical,<br>Conceptual Frame                                              | Main Findings                                                                                                                                                                                                                            |
|----|--------------------------------------------------------------------|---------------------------------------------------------------------------------------------------------------------------------------------|------------------------------------------------------------|-----------------------------------------------|--------------------------------------------------------------------------------------------|------------------------------------------------------------------------------------------------------------------------------------------------------------------------------------------------------------------------------------------|
| 60 | Petrone<br>2010                                                    | What is the nature of conflict in the skate park and what are the affordances/constraints of learning opportunities and identity formation? | Skateboarding<br><br>Various                               | <b>Qualitative</b><br><br><i>Ethnographic</i> | CoP, LPP;<br><br>Conceptual category of 'conflict';<br><br>Analysis not specified.         | Conflict and social and ideological tensions constitute key aspects of learning and teaching within CoP; Heckling and snaking contribute to identity construction (inclusion vs exclusion).                                              |
| 61 | Petrone<br>2008                                                    | To examine the learning and literacy practices in which a working class group of men engage in (skateboarding).                             | Skateboarding<br><br>Various                               | <b>Qualitative</b><br><br><i>Ethnographic</i> | Sociocultural and cultural-historical framework;<br><br>Open coding;<br>Inductive analysis | Cultural peers that support their learning. Cooperative competition enables the production of a group ethos and identity.                                                                                                                |
| 62 | Prelanda,<br>Cigrovski,<br>Božić,<br>Krčelić, &<br>Rađević<br>2015 | To identify how fear and courage affect kiteboard learning.                                                                                 | Kitesurfing<br><br>35 males;<br>(18-48years);<br>beginners | <b>Quantitative</b><br><br>Questionnaire      | Statistical data analysis                                                                  | Assumption that people with higher levels of fear would more slowly and less efficiently learn kiteboarding technique;<br>However, no correlation found in this study, potentially due to participants being willing to learn new sport. |

| #  | Authors/<br>Year     | Aim                                                                                                                                                                               | Sport/<br>Participants/<br>Skill level                                      | Study Design/<br>Study Tools                                                                                     | Analysis/<br>Theoretical,<br>Conceptual Frame                                                                                                            | Main Findings                                                                                                                                                                                                                                                         |
|----|----------------------|-----------------------------------------------------------------------------------------------------------------------------------------------------------------------------------|-----------------------------------------------------------------------------|------------------------------------------------------------------------------------------------------------------|----------------------------------------------------------------------------------------------------------------------------------------------------------|-----------------------------------------------------------------------------------------------------------------------------------------------------------------------------------------------------------------------------------------------------------------------|
| 63 | Rowlett<br>2015      | To examine how experiences common with the roller derby culture shapes 'newcomer' skaters.                                                                                        | Roller Derby<br><br>8 females;<br>(24-43years);<br>beginners                | <b>Qualitative</b><br><br>Interview                                                                              | Phenomenology,<br>Feminist standpoint<br>theory;<br><br>In vivo coding                                                                                   | Five significant aspects of participating in roller derby:<br>- Intimidation during the initial skating experience;<br>- Challenges of learning new skills;<br>- Developing and maintaining relationships;<br>- Feelings of strength;<br>- Relieving built-up stress. |
| 64 | Rynne<br>2016        | How localised surfing programs contribute to the lives of young people in selected indigenous communities, considering pedagogical properties and impact of SDP across Australia. | Surfing<br><br>23 males/females;<br>(15-25 years);<br>General<br>population | <b>Qualitative</b><br><br>Interview, focus groups,<br>questionnaire,<br>photos, video,<br>documents, field notes | Situated learning theory;<br>Workplace learning theory (relational interdependence, Billett);<br><br>Iterative storylines, hierarchical content analysis | Learning related to the spiritual (re-) connection with land and ocean, re-development of indigenous and surf-specific cultural knowledge and re-establishment of familial and community bonds.                                                                       |
| 65 | Scarpantonio<br>2016 | How would the implementation of an individualised training program impact the perceptions held by Minnows skaters related to skater training?                                     | Roller Derby<br><br>8-20 females;<br>skilled                                | <b>Qualitative</b><br><br><i>Action research</i><br><br>Interview                                                | Learning theory;<br><br>Generic thematic analysis                                                                                                        | Individualised programs supported skill progression and helped better meet the needs of sport participants.                                                                                                                                                           |

| #  | Authors/<br>Year                                                  | Aim                                                                                                                                                                                                                                             | Sport/<br>Participants/<br>Skill level                              | Study Design/<br>Study Tools                                                   | Analysis/<br>Theoretical,<br>Conceptual Frame                                                | Main Findings                                                                                                                                                                                                                                                                                                                      |
|----|-------------------------------------------------------------------|-------------------------------------------------------------------------------------------------------------------------------------------------------------------------------------------------------------------------------------------------|---------------------------------------------------------------------|--------------------------------------------------------------------------------|----------------------------------------------------------------------------------------------|------------------------------------------------------------------------------------------------------------------------------------------------------------------------------------------------------------------------------------------------------------------------------------------------------------------------------------|
| 66 | Seifert, Wattebled, L'hermette, Bideault, Herault, & Davids, 2013 | How does the environmental design shape perceptual-motor exploration when meta-stable regions of performance are created?                                                                                                                       | Rock climbing<br><br>9 males;<br>(M=21.9years);<br>skilled          | <b>Quantitative</b><br><br>Video, Inertial Measurement Unit (IMU)              | Ecological Dynamics Framework;<br><br>Statistical analysis;<br>ANOVAs                        | Meta-stable condition of performance may have afforded utilisation of more adaptive climbing behaviours.                                                                                                                                                                                                                           |
| 67 | Seifert, Boulanger, Orth, & Davids 2015                           | Can skill acquired in one region (gym) created through previous experiences, shape those that emerge in another region (ice climbing)?                                                                                                          | Ice Climbing<br><br>15 students;<br>(M=24.5years);<br>various       | <b>Quantitative</b><br><br>Video                                               | Ecological Dynamics Framework;<br><br>Statistical analysis;<br>Cluster hierarchical analysis | Positive effects of previous experience in rock climbing on performance outcomes, climbing movement fluency and (more broadly) movement coordination tendencies in participants climbing ice-falls.                                                                                                                                |
| 68 | Seifert, Orth, Mantel, Boulanger, H  rault, & Dicks 2018          | The aim of this study was to investigate how the affordances of an indoor climbing wall changed for intermediate climbers following a period of practice during which hold orientation was manipulated within a learning and transfer protocol. | Climbing<br><br>8 males/females;<br>(M=21.0 years);<br>intermediate | <b>Quantitative</b><br><br>Questionnaire;<br>IMU with North magnetic Reference | Statistical Analysis;<br>Two-way ANOVA                                                       | With practice, climbers learnt to explore as they improved their attunement to affordances and they enlarged their landscape of affordances; in particular, the climbers improved their route-finding skill, hold grasp-ability and use-ability. However, these improvements were dependent on the complexity of the route design. |

| #  | Authors/<br>Year                   | Aim                                                                                                                                   | Sport/<br>Participants/<br>Skill level                                | Study Design/<br>Study Tools                                                                              | Analysis/<br>Theoretical,<br>Conceptual Frame           | Main Findings                                                                                                                                                                                                     |
|----|------------------------------------|---------------------------------------------------------------------------------------------------------------------------------------|-----------------------------------------------------------------------|-----------------------------------------------------------------------------------------------------------|---------------------------------------------------------|-------------------------------------------------------------------------------------------------------------------------------------------------------------------------------------------------------------------|
| 69 | Smith, P.<br>2002                  | Does intermixing practice of two versions of a complex task lead to better retention of skill than blocked practice of the same task? | Snowboarding<br><br>20 males/females;<br>(18-32years);<br>beginners   | <b>Quantitative</b><br><br>10-point scale                                                                 | 2x2 (practice condition x task)<br>analysis of variance | Alternating practice improves performance compared to blocked practices.                                                                                                                                          |
| 70 | Smith, T.<br>2010                  | How do non-traditional sports, such as surfing, affect self-worth, self-esteem, and positive behaviour change?                        | Surfing<br><br>17 participants;<br>(8-18years)                        | <b>Qualitative</b><br><br><i>Causal-relationship design model</i><br><br>Survey, Focus group, observation | Statistical analysis<br>(descriptive results)           | Adolescents achieved higher self-esteem levels, increased positive self-worth, and behaviour change through non-traditional sports.                                                                               |
| 71 | Snyder<br>2011                     | Examining the subcultural careers of skateboarding.                                                                                   | Skateboarding<br><br>Various                                          | <b>Qualitative</b><br><br><i>Ethnography</i>                                                              | Not specified                                           | The subculture is sustainable through the documentation of skateboard tricks which is shared via magazines and videos; the process creates opportunities for various career options (photographer, videographer). |
| 72 | Stewart, Traitor, & Hanson<br>2014 | To examine player attitudes toward the use of technology as a training aid.                                                           | Roller Derby<br><br>323 females<br>(91%);<br>(21-49years);<br>various | <b>Qualitative</b><br><br>Survey                                                                          | Not specified                                           | Skaters welcomed a training aid to improve speed and endurance on the track.                                                                                                                                      |

| #  | Authors/<br>Year                | Aim                                                                                                                                                                                           | Sport/<br>Participants/<br>Skill level                                                                                        | Study Design/<br>Study Tools                                      | Analysis/<br>Theoretical,<br>Conceptual Frame                        | Main Findings                                                                                                                                                                                                                                                                                                                                                                              |
|----|---------------------------------|-----------------------------------------------------------------------------------------------------------------------------------------------------------------------------------------------|-------------------------------------------------------------------------------------------------------------------------------|-------------------------------------------------------------------|----------------------------------------------------------------------|--------------------------------------------------------------------------------------------------------------------------------------------------------------------------------------------------------------------------------------------------------------------------------------------------------------------------------------------------------------------------------------------|
| 73 | Thorpe &<br>Ahmad<br>2013       | To examine how parkour practitioners utilise the internet and social media to facilitate trans-local interactions with youth around the world for social, educational and political purposes. | Parkour<br><br>Males                                                                                                          | <b>Qualitative</b><br><br>Interview<br>Media                      | Difficult to ascertain.                                              | The creative engagement in social media assisted in sharing knowledge, building dialogues with others, and had psychosocial benefits (e.g. escape from fear, frustration and anxiety).                                                                                                                                                                                                     |
| 74 | Wheaton &<br>O'Loughlin<br>2017 | Insight into the poetization of parkour and its challenges in maintaining its diversity and inspiring participation.                                                                          | Parkour<br><br>Various                                                                                                        | <b>Qualitative</b><br><br><i>Interpretivist<br/>ethnography</i>   | Learning as contextual and situated                                  | Informal sporting activities can promote inclusive and equitable physical cultures.<br>The professional development of coaches ('engaged pedagogy' – model) and CoP encouraged.                                                                                                                                                                                                            |
| 75 | Willmott &<br>Collins<br>2017   | Understanding the 'what' and 'how' of trick progression in snowboarding and freeskiing.                                                                                                       | Freeskiing/<br>Snowboard<br><br>Athletes:<br>8 males/females;<br>(M=22.5years);<br>Expert<br><br>5 Coaches;<br>(M=38.8 years) | <b>Mixed Method</b><br><br>Interview;<br>Data collection<br>sheet | Content analysis of<br>interview transcripts;<br>Calculation (Excel) | High variance in trick progression; Athletes move through different stages during the year subject to experiencing the right conditions and facilities, balancing time for progression with time for consolidation, competition periods, and rehabilitating from injuries. Optimal use of training aids to reduce the level of challenge and, injury-risk should be considered by coaches. |

| #  | Authors/<br>Year                       | Aim                                                                                                                        | Sport/<br>Participants/<br>Skill level     | Study Design/<br>Study Tools                                                                                                      | Analysis/<br>Theoretical,<br>Conceptual Frame       | Main Findings                                                                                                                                                                                                                                                                         |
|----|----------------------------------------|----------------------------------------------------------------------------------------------------------------------------|--------------------------------------------|-----------------------------------------------------------------------------------------------------------------------------------|-----------------------------------------------------|---------------------------------------------------------------------------------------------------------------------------------------------------------------------------------------------------------------------------------------------------------------------------------------|
| 76 | Wilson<br>2007                         | To examine sense making behaviours under fatigue and uncertain contexts.                                                   | Adventure racing                           | <b>Mixed Method</b><br><br><i>Conversational analysis and visual ethnography;</i><br><br>Interview, satellite data, video         | Interpretive schemas, Coding                        | Three types of sense-making moves, including information-, meaning-making- and action moves. Teams adapted learning behaviour to extreme contexts by managing mindful interactions, adopting functional model of sense-making leadership and by proactively disclosing vulnerability. |
| 77 | Woermann<br>2012                       | To analyse the significance of social media for a range of bodily subcultural practices.                                   | Freeskiing<br><br>Various                  | <b>Qualitative</b><br><br><i>Single ethnographic case</i>                                                                         | Difficult to ascertain                              | Social media has become integral to hedonic, reflexive, and knowledge practices of action sports participants. Being a freeskiier means producing and consuming social media.                                                                                                         |
| 78 | Zabala, Sánchez-Muñoz, & Mateo<br>2009 | Can the administration of self-controlled, positive and external-focus feedback improve the performance of BMX gate start? | BMX<br><br>6 males; (M=19.3 years); Expert | <b>Mixed Method</b><br><br><i>Intra-group experimental design with repeated measures</i><br><br>Interview, systematic observation | Statistical analysis; ANOVA<br>Qualitative analysis | Audio-visual feedback and cognitive training of the skill can result in significant improvements in the execution of the gate start in BMX.                                                                                                                                           |
